# Supplementary material
Source: PubMed Central journal article supplement (PMC5612123)
Supplement: 10.1074_M117.785709_jbc.M117.785709-1.pdf [file 10.1074_M117.785709_jbc.M117.785709-1.pdf]

Figure S1

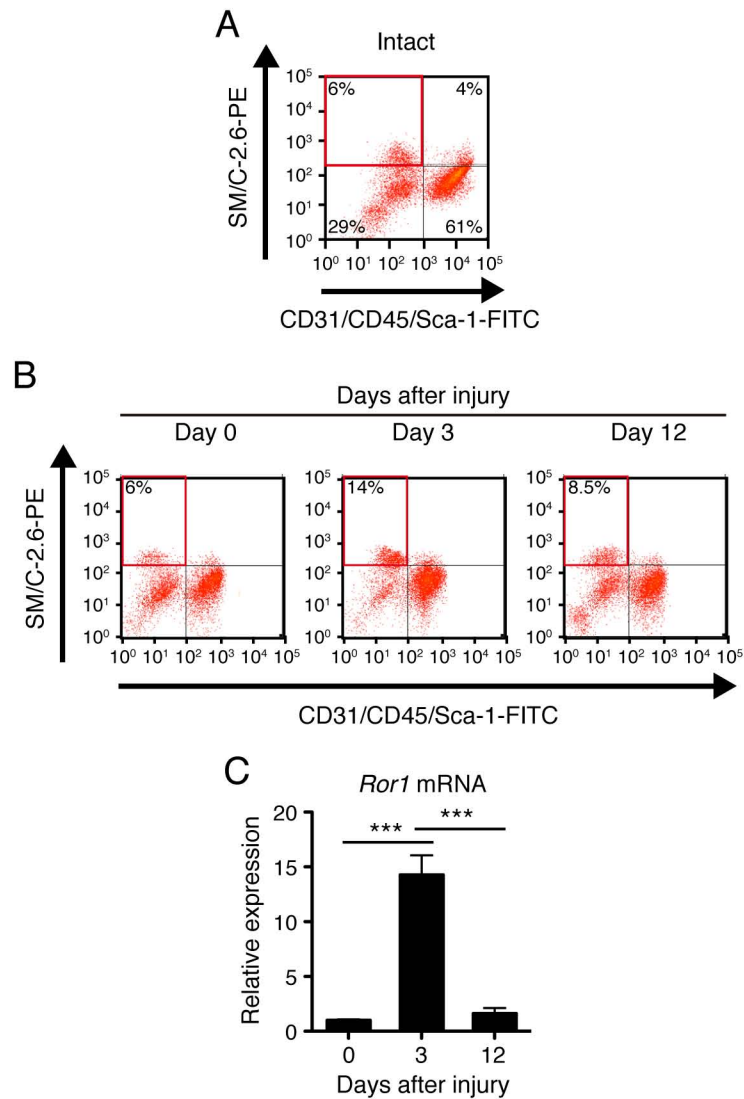

**Figure S1. Expression of *Ror1* is induced in the SC-populations during skeletal muscle regeneration.** (A) A proportion of SCs from the intact skeletal muscles were examined by FACS analysis using anti-CD31, anti-CD45, anti-Sca-1 and SM/C-2.6 antibodies. SCs can be characterized as CD31-, CD45-, Sca-1- and SM/C-2.6+ cells (see Experimental procedures). SC-populations in dot plot panels were indicated by the surrounding lines in red. (B) Cells were separated from the CTX-treated skeletal muscles at the indicated time points during skeletal muscle regeneration by FACS. (C) Expression levels of *Ror1* mRNA in SCs from the CTX-treated skeletal muscles were measured by qRT-PCR at the indicated time points during muscle regeneration. Relative expression values were determined by defining expression level of *Ror1* at day 0 as 1. Data are expressed as mean  $\pm$  SD (n=3 animals) (\*\*\*) $P$ <0.001, Bonferroni's post-hoc test).

Figure S2

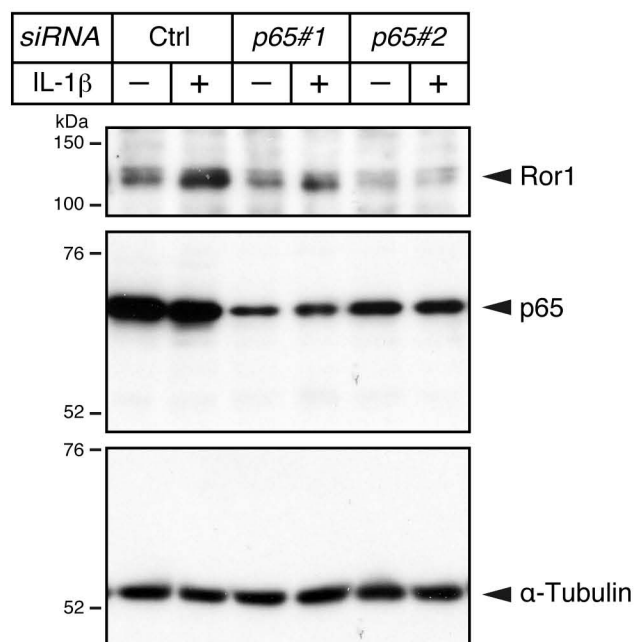

**Figure S2. Expression of Ror1 induced by IL-1 $\beta$  is mediated by NF- $\kappa$ B pathway.** Ror1, p65 and  $\alpha$ -tubulin proteins in cell lysates (10  $\mu$ g proteins in total) from C2C12 cells transiently transfected with either *p65 siRNAs* or control *siRNA* after stimulation with IL-1 $\beta$  (final concentration of 20 ng/ml) or vehicle alone (-) for 24 hrs were measured by Western blotting with anti-Ror1, anti-p65 or anti- $\alpha$ -tubulin antibodies, respectively.

Figure S3

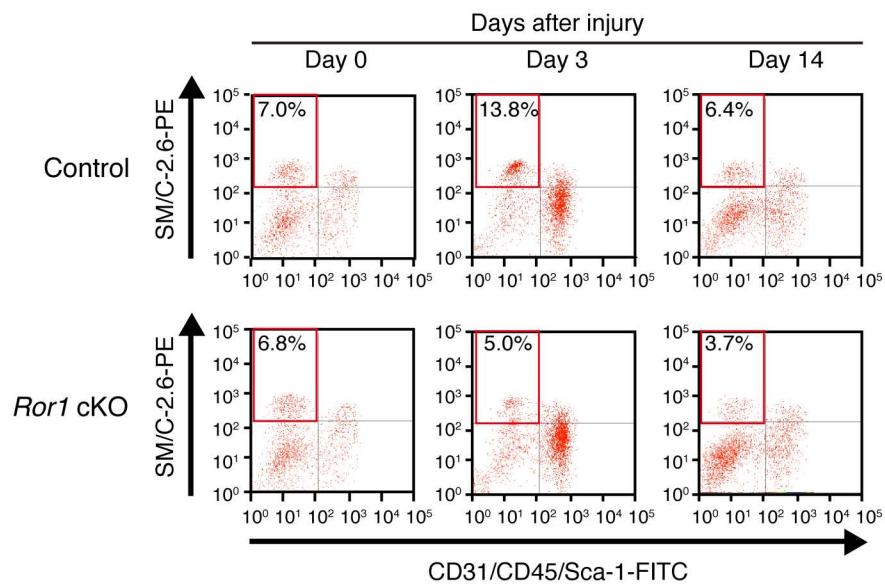

**Figure S3. *Ror1* deficiency in SCs suppresses injury-induced increase in the proportion of SCs.** Proportion of SCs in control and *Ror1* cKO mice during regeneration of the skeletal muscles damaged by CTX. Cells were separated from the CTX-treated skeletal muscles at the indicated time points during their regeneration by FACS. SC-populations in dot plot panels were indicated by the surrounding lines in red.

Figure S4

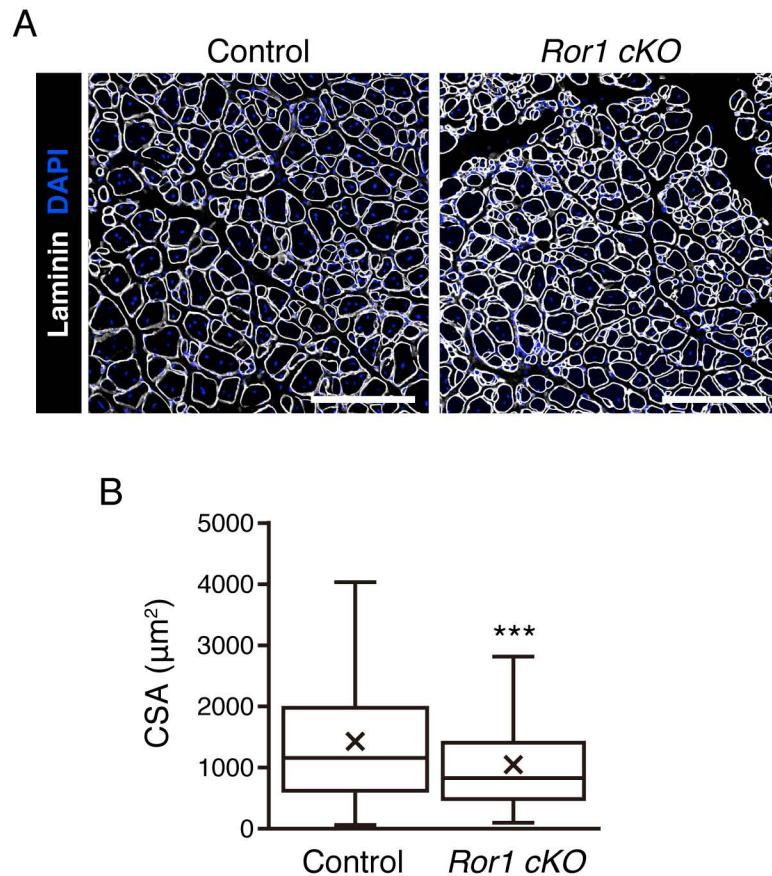

**Figure S4. *Ror1* deficiency in SCs decreases myofiber size during skeletal muscle regeneration.**

(A) Representative images of TA muscle cross sections from control mice (*Ror1<sup>flox/flox</sup>*) and *Ror1* cKO mice (*Ror1<sup>flox/flox</sup>, Pax7<sup>creERT2/+</sup>*) at 14 days post-CTX injury. Scale bar is 200  $\mu\text{m}$ . (B) Quantification of cross-sectional area (CSA) of myofibers from control mice (*Ror1<sup>flox/flox</sup>*) and *Ror1* cKO mice (*Ror1<sup>flox/flox</sup>, Pax7<sup>creERT2/+</sup>*) at 14 days post-CTX injury. Data are presented as box-and-whisker plots with average values ( $\times$ ) [control mice; 2542 fibers, *Ror1* cKO mice; 3088 fibers] (\*\*\*) ( $P < 0.001$ , *t*-test).
